# Supplementary material for: Synthesis, liquid crystal characterization and photo-switching studies on fluorine substituted azobenzene based esters
Source: Royal Society of Chemistry journal article supplement (doi:10.1039/c4ra13700k), 2014-12-15

## Synthesis, liquid crystal characterization and photo-switching studies on fluorine substituted azobenzene based esters

S. M. Gan, A. R. Yuvaraj, M. R. Lutfor, M. Y. Mashitah, Hegde Gurumurthy\*

### Supplementary information:

#### Compound D<sub>1</sub>

##### <sup>1</sup>H-NMR

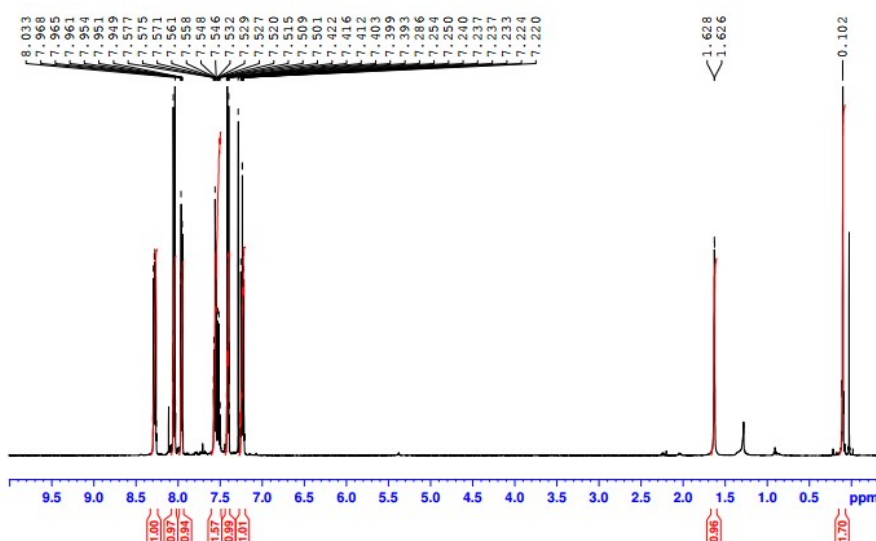

##### <sup>13</sup>C-NMR

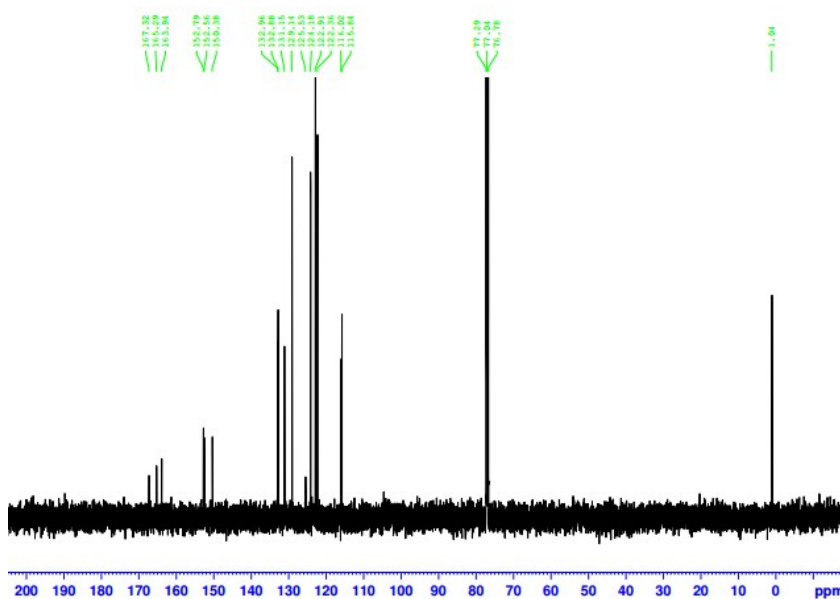

# Compound D2

## 1H NMR

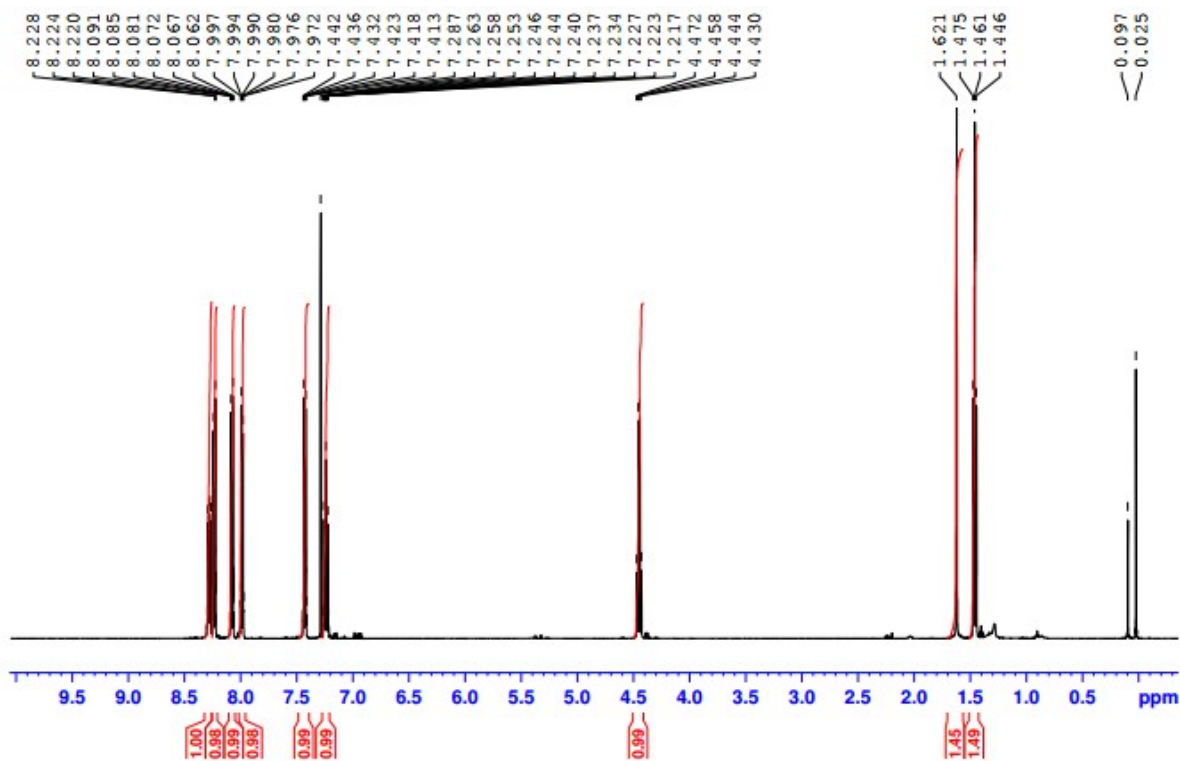

## 13C NMR

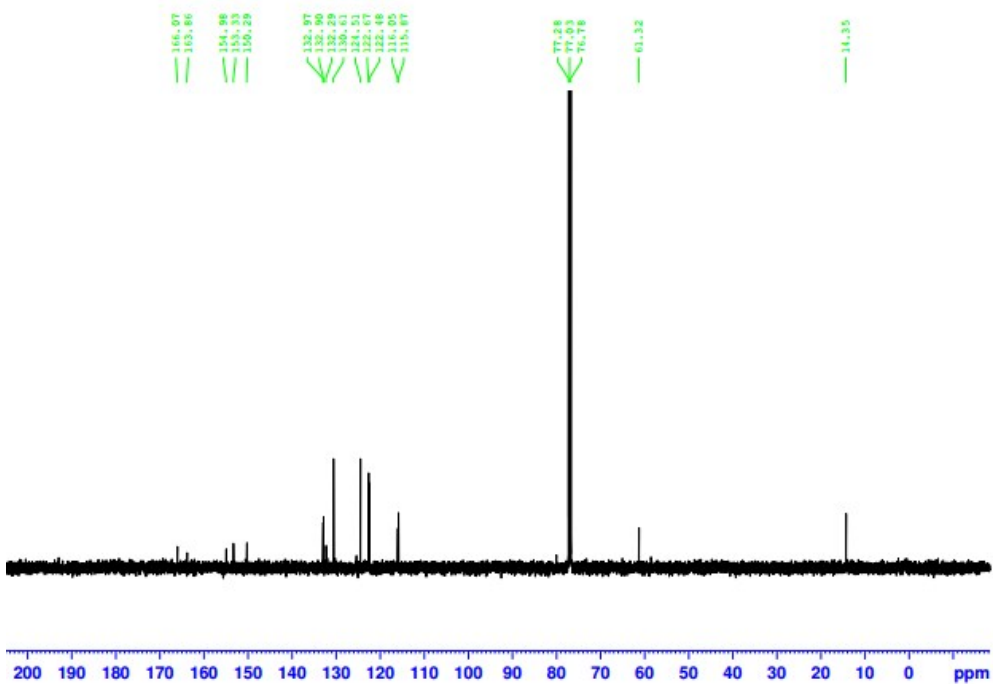

Compound E1

<sup>1</sup>H NMR

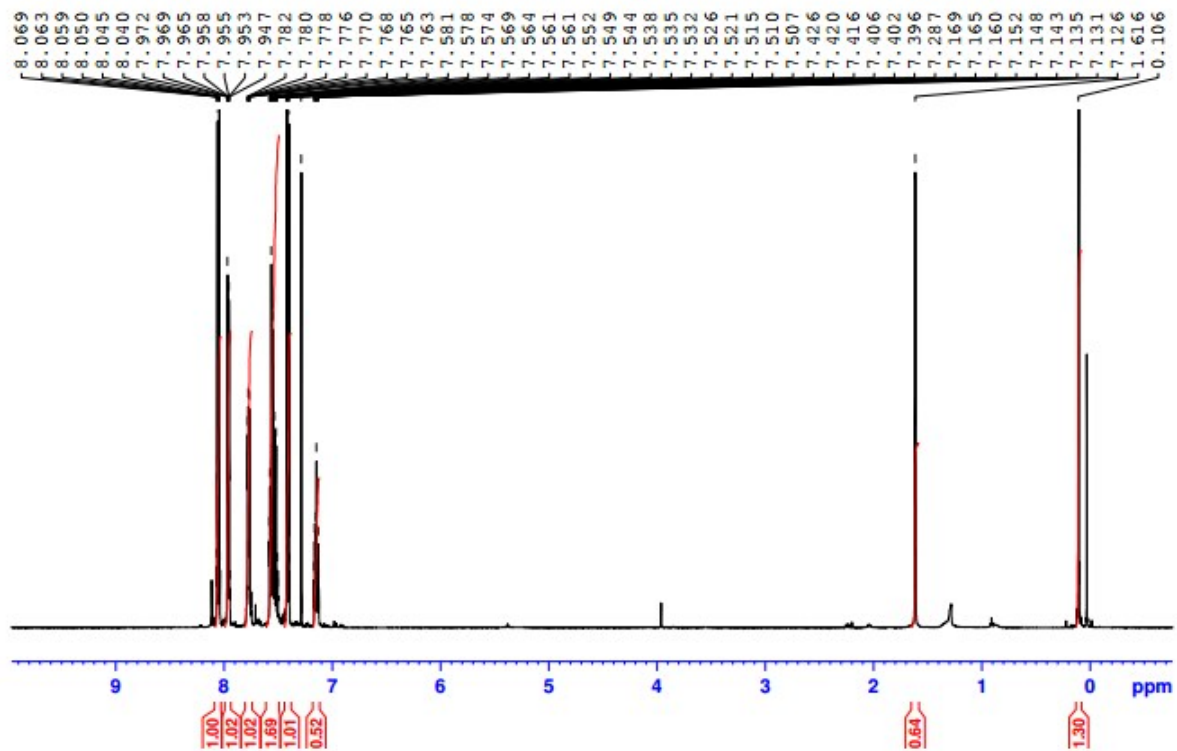

<sup>13</sup>C NMR

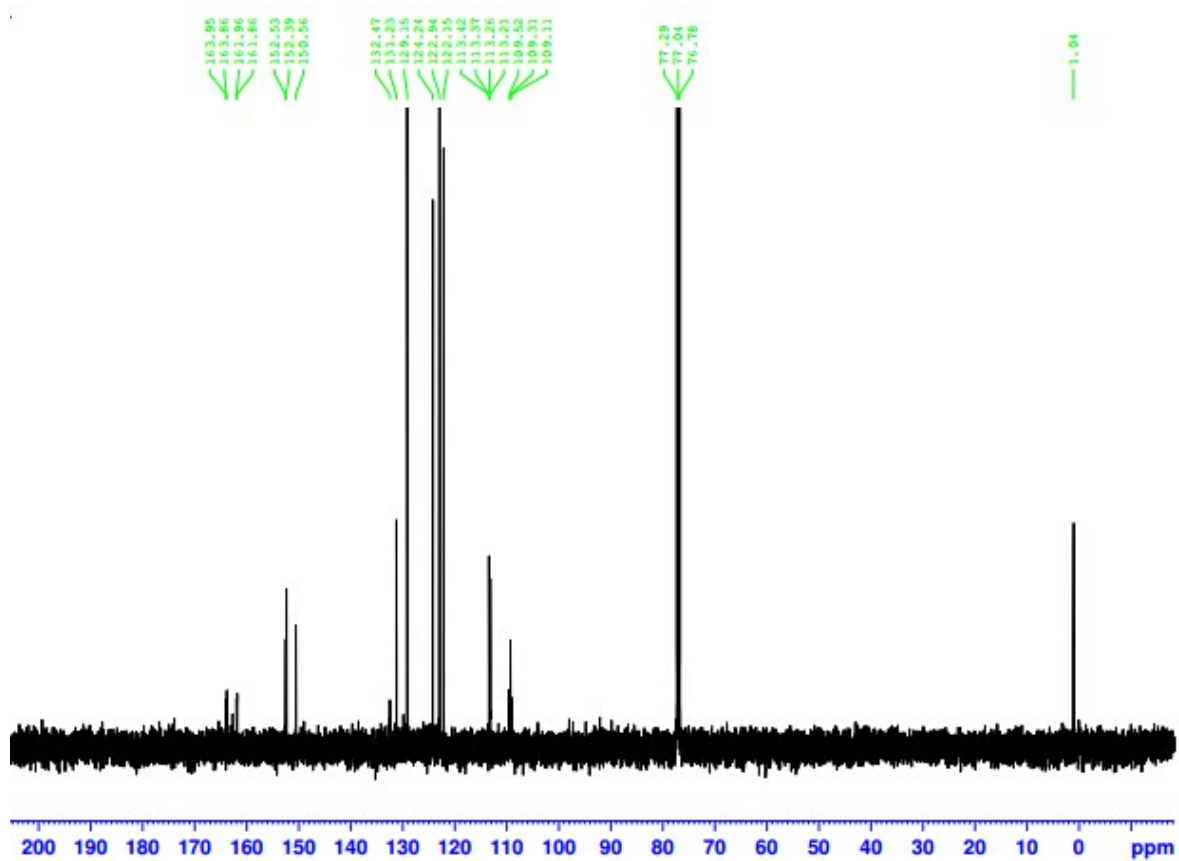

- The below compound structure is similar to the synthesized compounds reported in the manuscript. This study is to justify the effect of “fluorine functional group”.

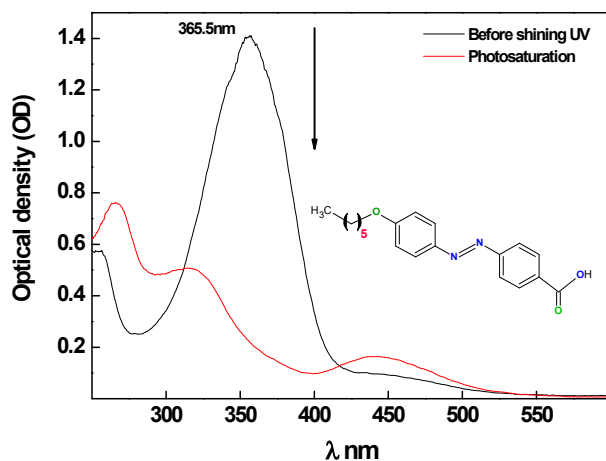

**Photosaturation: 4min**

**Thermal back relaxation: 3.4hours**

- In our earlier manuscript, we replaced the ester linkage by amide moiety. This study gives the justification to the effect of “ester group” discussed in the manuscript. Here, we have amide linkage instead of ester group.

| Sl. No. | Compound name & structure.                                                                                                                    | Electronic properties with respect to the terminal functional groups.           | Photo-isomerization |                         |
|---------|-----------------------------------------------------------------------------------------------------------------------------------------------|---------------------------------------------------------------------------------|---------------------|-------------------------|
|         |                                                                                                                                               |                                                                                 | Photo-saturation    | Thermal back relaxation |
| 1       | 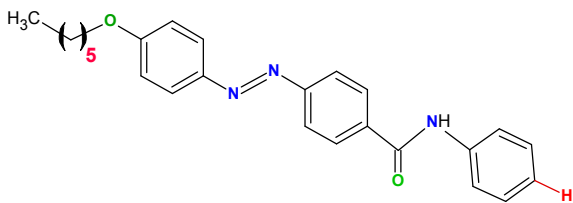 <p style="text-align: center;"><b>(E<sub>1</sub>)</b></p> | No substituent group at the para position w.r.t. amide.                         | 18 seconds          | 9.21 hours              |
| 2       |  <p style="text-align: center;"><b>(E<sub>2</sub>)</b></p> | The strong electron withdrawing group –NO <sub>2</sub> causes more “+M effect”. | 20 seconds          | 5.73 hours              |

### Photosaturation:

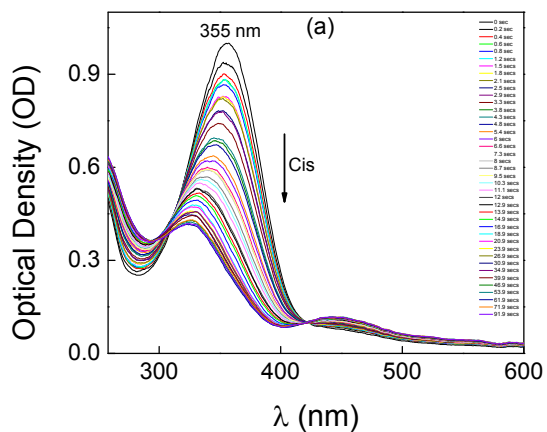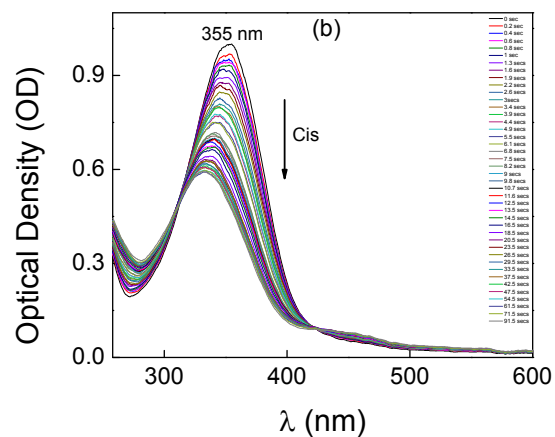

### Thermal back relaxation:

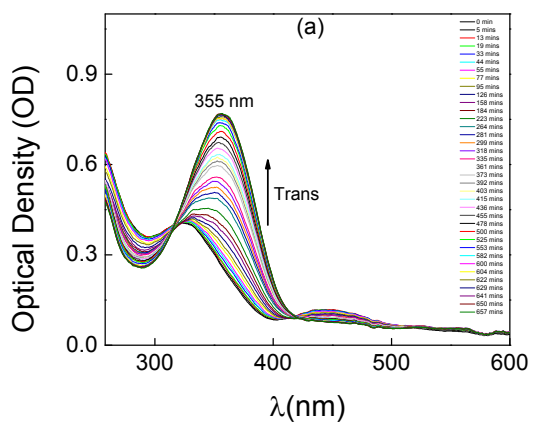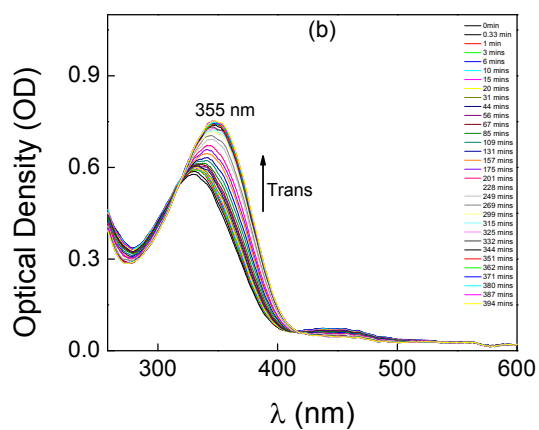

Supplement: c4ra13700k1.pdf [file c4ra13700k1.pdf]
